# Supplementary material for: Prognostic Factors in Survivors of Gastric Cancer: A Comparative Study of Cox Proportional Hazards Model and Machine Learning Approaches Using Korean National Cohort Data
Source: Research Square preprint supplement (doi:10.21203/rs.3.rs-7022055/v1), 2025-08-08
Supplement: Supplementary file 1 [file 8f2f962e59cce54bf72d08b2.docx]

**Supplementary Table 1. Baseline characteristics of the study population without missing values categorized by gastric cancer recurrence and mortality**

|  |  |  | **Recurrence** | | | **Gastric cancer mortality** | | |
| --- | --- | --- | --- | --- | --- | --- | --- | --- |
|  |  | **Overall** | **Disease Free** | **Recurrence** | **P-Value** | **Survived** | **Death** | **P-Value** |
| n |  | 4945 | 4621 | 324 |  | 204 | 4741 |  |
| Age (years), mean (SD) |  | 62.6 (10.1) | 62.6 (10.1) | 62.5 (9.6) | 0.888 | 66.0 (10.5) | 62.4 (10.0) | <0.001 |
| Age group, n (%) | <60yrs | 1907 (38.56) | 1784 (38.61) | 123 (37.96) | 0.818 | 1850 (39.02) | 57 (27.94) | 0.002 |
|  | ≥60yrs | 3038 (61.44) | 2837 (61.39) | 201 (62.04) |  | 2891 (60.98) | 147 (72.06) |  |
| Sex, n (%) | Female | 1546 (31.3) | 1468 (31.8) | 78 (24.1) | 0.005 | 60 (29.4) | 1486 (31.3) | 0.613 |
|  | Male | 3399 (68.7) | 3153 (68.2) | 246 (75.9) |  | 144 (70.6) | 3255 (68.7) |  |
| T stage, n (%) | T1 | 3970 (80.3) | 3778 (81.8) | 192 (59.3) | <0.001 | 55 (27.0) | 3915 (82.6) | <0.001 |
|  | T2 | 380 (7.7) | 360 (7.8) | 20 (6.2) |  | 21 (10.3) | 359 (7.6) |  |
|  | T3 | 362 (7.3) | 319 (6.9) | 43 (13.3) |  | 53 (26.0) | 309 (6.5) |  |
|  | T4 | 233 (4.7) | 164 (3.5) | 69 (21.3) |  | 75 (36.8) | 158 (3.3) |  |
| N stage, n (%) | N0 | 4366 (88.3) | 4151 (89.8) | 215 (66.4) | <0.001 | 78 (38.2) | 4288 (90.4) | <0.001 |
|  | N1 | 179 (3.6) | 157 (3.4) | 22 (6.8) |  | 24 (11.8) | 155 (3.3) |  |
|  | N2 | 190 (3.8) | 161 (3.5) | 29 (9.0) |  | 34 (16.7) | 156 (3.3) |  |
|  | N3 | 210 (4.2) | 152 (3.3) | 58 (17.9) |  | 68 (33.3) | 142 (3.0) |  |
| Differentiation, n (%) | Well-differentiated | 1295 (26.2) | 1204 (26.1) | 91 (28.1) | 0.279 | 24 (11.8) | 1271 (26.8) | <0.001 |
|  | Moderately differentiated | 1916 (38.7) | 1804 (39.0) | 112 (34.6) |  | 67 (32.8) | 1849 (39.0) |  |
|  | Poorly differentiated | 1734 (35.1) | 1613 (34.9) | 121 (37.3) |  | 113 (55.4) | 1621 (34.2) |  |
| size, n (%) | ≤1 cm | 4887 (98.8) | 4571 (98.9) | 316 (97.5) | 0.053 | 188 (92.2) | 4699 (99.1) | <0.001 |
|  | >1 cm | 58 (1.2) | 50 (1.1) | 8 (2.5) |  | 16 (7.8) | 42 (0.9) |  |
| CEA, n (%) | Normal | 4503 (91.1) | 4225 (91.4) | 278 (85.8) | <0.001 | 163 (79.9) | 4340 (91.5) | <0.001 |
|  | Elevated | 442 (8.9) | 396 (8.6) | 46 (14.2) |  | 41 (20.1) | 401 (8.5) |  |
| Remnant stomach, n (%) | Whole | 1229 (24.9) | 1088 (23.5) | 141 (43.5) | <0.001 | 11 (5.4) | 1218 (25.7) | <0.001 |
|  | Proximal | 3114 (63.0) | 2979 (64.5) | 135 (41.7) |  | 121 (59.3) | 2993 (63.1) |  |
|  | Distal | 79 (1.6) | 74 (1.6) | 5 (1.5) |  | 2 (1.0) | 77 (1.6) |  |
|  | None | 523 (10.6) | 480 (10.4) | 43 (13.3) |  | 70 (34.3) | 453 (9.6) |  |
| CCI, n (%) | 0 | 4222 (85.4) | 3942 (85.3) | 280 (86.4) | 0.255 | 171 (83.8) | 4051 (85.4) | <0.001 |
|  | 1 | 497 (10.1) | 468 (10.1) | 29 (9.0) |  | 21 (10.3) | 476 (10.0) |  |
|  | 2 | 194 (3.9) | 183 (4.0) | 11 (3.4) |  | 7 (3.4) | 187 (3.9) |  |
|  | 3 | 23 (0.5) | 21 (0.5) | 2 (0.6) |  | 2 (1.0) | 21 (0.4) |  |
|  | 4 | 7 (0.1) | 5 (0.1) | 2 (0.6) |  | 2 (1.0) | 5 (0.1) |  |
|  | 5 | 2 (0.0) | 2 (0.0) | 0 (0.0) |  | 1 (0.5) | 1 (0.0) |  |
| *H. pylori* eradication, n (%) | No | 3489 (70.6) | 3259 (70.5) | 230 (71.0) | 0.91 | 189 (92.6) | 3300 (69.6) | <0.001 |
|  | Yes | 1456 (29.4) | 1362 (29.5) | 94 (29.0) |  | 15 (7.4) | 1441 (30.4) |  |
| Socioeconomic status, n (%) | Bottom | 114 (2.3) | 112 (2.4) | 2 (0.6) | 0.083 | 5 (2.5) | 109 (2.3) | 0.369 |
|  | Low | 1478 (29.9) | 1376 (29.8) | 102 (31.5) |  | 72 (35.3) | 1406 (29.7) |  |
|  | Middle | 1963 (39.7) | 1824 (39.5) | 139 (42.9) |  | 76 (37.3) | 1887 (39.8) |  |
|  | High | 1390 (28.1) | 1309 (28.3) | 81 (25.0) |  | 51 (25.0) | 1339 (28.2) |  |
| Metabolic syndrome, n (%) | No | 3457 (69.9) | 3236 (70.0) | 221 (68.2) | 0.531 | 142 (69.6) | 3315 (69.9) | 0.986 |
|  | Ye | 1488 (30.1) | 1385 (30.0) | 103 (31.8) |  | 62 (30.4) | 1426 (30.1) |  |
| BMI before cure, mean (SD) |  | 23.7 (2.7) | 23.7 (2.8) | 23.8 (2.7) | 0.394 | 23.3 (2.6) | 23.7 (2.8) | 0.017 |
| BMI change after cure, mean (SD) |  | -0.6 (1.5) | -0.6 (1.5) | -0.4 (1.5) | 0.012 | -0.3 (1.2) | -0.6 (1.5) | <0.001 |
| BMI change after cure, n (%) | No change (-1~1) | 3050 (61.68) | 2832 (61.29) | 218 (67.28) | 0.018 | 2874 (60.62) | 176 (86.27) | <0.001 |
|  | Good change (≤-1) | 1518 (30.70) | 1441 (31.18) | 77 (23.77) |  | 1492 (31.47) | 26 (12.75) |  |
|  | Bad change (≥+1) | 377 (7.62) | 348 (7.53) | 29 (8.95) |  | 375 (7.91) | 2 (0.98) |  |
| Smoking status before cure, n (%) | Never smoker | 2326 (47.0) | 2188 (47.3) | 138 (42.6) | 0.044 | 99 (48.5) | 2227 (47.0) | 0.904 |
|  | Ex-smoker | 1186 (24.0) | 1090 (23.6) | 96 (29.6) |  | 47 (23.0) | 1139 (24.0) |  |
|  | Current smoker | 1433 (29.0) | 1343 (29.1) | 90 (27.8) |  | 58 (28.4) | 1375 (29.0) |  |
| Smoking status change after cure, n (%) | No change | 4680 (94.6) | 4369 (94.5) | 311 (96.0) | 0.524 | 201 (98.5) | 4479 (94.5) | 0.04 |
|  | Good change | 239 (4.8) | 227 (4.9) | 12 (3.7) |  | 3 (1.5) | 236 (5.0) |  |
|  | Bad change | 26 (0.5) | 25 (0.5) | 1 (0.3) |  | 0 (0.0) | 26 (0.5) |  |
| Drinking frequency before cure, n (%) | Non drinker | 2726 (55.1) | 2550 (55.2) | 176 (54.3) | 0.41 | 116 (56.9) | 2610 (55.1) | 0.107 |
|  | Rare drinker | 1207 (24.4) | 1127 (24.4) | 80 (24.7) |  | 43 (21.1) | 1164 (24.6) |  |
|  | Intermediate drinker | 602 (12.2) | 568 (12.3) | 34 (10.5) |  | 20 (9.8) | 582 (12.3) |  |
|  | Frequent drinker | 410 (8.3) | 376 (8.1) | 34 (10.5) |  | 25 (12.3) | 385 (8.1) |  |
| Drinking frequency change after cure, n (%) | No change | 4666 (94.4) | 4355 (94.2) | 311 (96.0) | 0.081 | 200 (98.0) | 4466 (94.2) | 0.064 |
|  | Good change | 232 (4.7) | 224 (4.8) | 8 (2.5) |  | 3 (1.5) | 229 (4.8) |  |
|  | Bad change | 47 (1.0) | 42 (0.9) | 5 (1.5) |  | 1 (0.5) | 46 (1.0) |  |
| Physical activity before cure, n (%) | No | 2509 (50.7) | 2337 (50.6) | 172 (53.1) | 0.414 | 124 (60.8) | 2385 (50.3) | 0.004 |
|  | Yes | 2436 (49.3) | 2284 (49.4) | 152 (46.9) |  | 80 (39.2) | 2356 (49.7) |  |
| Physical activity change after cure, n (%) | No change | 4478 (90.6) | 4173 (90.3) | 305 (94.1) | 0.048 | 192 (94.1) | 4286 (90.4) | 0.185 |
|  | Good change | 234 (4.7) | 227 (4.9) | 7 (2.2) |  | 5 (2.5) | 229 (4.8) |  |
|  | Bad change | 233 (4.7) | 221 (4.8) | 12 (3.7) |  | 7 (3.4) | 226 (4.8) |  |
| Family history of gastric cancer, n (%) | No | 3065 (62.0) | 2838 (61.4) | 227 (70.1) | 0.002 | 166 (81.4) | 2899 (61.1) | <0.001 |
|  | Yes | 1880 (38.0) | 1783 (38.6) | 97 (29.9) |  | 38 (18.6) | 1842 (38.9) |  |

**Supplementary Table 2. Hazard ratios of gastric cancer recurrence and mortality in patients without missing data**

|  |  | **Recurrence** | | **Mortality** | |
| --- | --- | --- | --- | --- | --- |
|  |  | **Univariate** | **Multivariate** | **Univariate** | **Multivariate** |
|  |  | **HR (95% CI)** | **HR (95% CI)** | **HR (95% CI)** | **HR (95% CI)** |
| Sex | Male (vs. Female) | 1.45 (1.13-1.88)* | 1.66 (1.18-2.33)* | 1.10 (0.81-1.48) | 1.49 (0.99-2.26) |
| Age † |  | 1.00 (0.99-1.01) | 0.99 (0.98-1.00) | 1.67 (1.23-2.27)* | 1.74 (1.25-2.43)* |
| T stage | T2 (vs. T1) | 1.11 (0.70-1.75) | 1.99 (1.14-3.47)* | 4.05 (2.45-6.69)* | 1.89 (1.07-3.33)* |
|  | T3 (vs. T1) | 2.67 (1.92-3.72)* | 3.65 (2.24-5.96)* | 11.45 (7.85-16.70)* | 3.64 (2.21-5.99)* |
|  | T4 (vs. T1) | 7.63 (5.79-10.05)* | 7.90 (4.75-13.16)* | 27.74 (19.58-39.30)* | 6.38 (3.77-10.79)* |
| N stage | N1 (vs. N0) | 2.69 (1.73-4.17)* | 2.14 (1.24-3.69)* | 7.96 (5.03-12.57)* | 2.56 (1.49-4.38)* |
|  | N2 (vs. N0) | 3.33 (2.26-4.91)* | 2.79 (1.70-4.57)* | 10.55 (7.05-15.79)* | 3.35 (2.06-5.44)* |
|  | N3 (vs. N0) | 7.08 (5.29-9.46)* | 3.53 (2.21-5.66)* | 22.10 (15.95-30.60)* | 4.90 (3.07-7.80)* |
| Remnant stomach | Proximal (vs. Whole) | 0.36 (0.28-0.46) | 0.12 (0.08-0.17)* | 4.35 (2.35-8.06)* | 1.39 (0.68-2.84) |
|  | Distal (vs. Whole) | 0.55 (0.22-1.34) | 0.21 (0.08-0.55)* | 2.91 (0.65-13.12) | 1.02 (0.21-4.80) |
|  | None (vs. Whole) | 0.72 (0.51-1.02) | 0.12 (0.07-0.19)* | 15.89 (8.41-30.00)* | 2.51 (1.18-5.38)* |
| Size | >1 cm (vs. ≤1 cm) | 2.36 (1.17-4.75)* | 0.64 (0.30-1.35) | 8.04 (4.82-13.39)* | 0.88 (0.50-1.55) |
| Differentiation | Moderately differentiated (vs. WD) | 0.84 (0.64-1.11) | 1.07 (0.80-1.45) | 1.91 (1.20-3.05)* | 0.86 (0.52-1.43) |
|  | Poorly differentiated (vs. WD) | 1.01 (0.77-1.32) | 1.32 (0.92-1.90) | 3.59 (2.31-5.58)* | 0.85 (0.51-1.43) |
| CEA | Elevated (vs. Normal) | 1.80 (1.32-2.46)* | 1.30 (0.94-1.80) | 2.70 (1.92-3.80)* | 1.30 (0.90-1.87) |
| CCI |  | 1.02 (0.83-1.25) | 1.13 (0.92-1.38) | 1.24 (1.00-1.54) | 1.21 (0.97-1.51) |
| *H. pylori* eradication | Yes (vs. No) | 0.97 (0.76-1.23) | 0.78 (0.59-1.03) | 0.19 (0.11-0.31)* | 0.51 (0.29-0.88)* |
| Socioeconomic status | Bottom (vs. Low) | 0.25 (0.06-1.02) | 0.24 (0.06-0.99) | 0.91 (0.37-2.25) | 0.75 (0.29-1.94) |
|  | Middle (vs. Low) | 1.02 (0.79-1.32) | 0.96 (0.74-1.24) | 0.79 (0.57-1.09) | 0.72 (0.52-1.00) |
|  | High (vs. Low) | 0.84 (0.63-1.12) | 0.84 (0.62-1.12) | 0.75 (0.52-1.07) | 0.83 (0.57-1.21) |
| Metabolic syndrome | Yes (vs. No) | 1.10 (0.87-1.39) | 1.03 (0.80-1.34) | 1.03 (0.76-1.39) | 1.23 (0.89-1.71) |
| BMI before cure |  | 1.02 (0.98-1.06) | 1.01 (0.96-1.05) | 0.94 (0.89-0.99)* | 0.97 (0.92-1.03) |
| BMI change after cure ‡ | Bad change (vs. No change) | 1.11 (1.03-1.20)* | 0.98 (0.90-1.07) | 0.09 (0.02-0.36)* | 0.24 (0.06-1.03) |
|  | Good change (vs. No change) |  |  | 0.28 (0.19-0.43)* | 0.40 (0.25-0.63)* |
| Smoking status before cure | Current smoker (vs. Never smoker) | 1.06 (0.81-1.39) | 0.79 (0.56-1.11) | 0.95 (0.69-1.32) | 0.83 (0.54-1.28) |
|  | Ex-smoker (vs. Never smoker) | 1.38 (1.06-1.79)* | 1.06 (0.77-1.45) | 0.93 (0.66-1.31) | 1.00 (0.65-1.52) |
| Smoking status change after cure | Bad change (vs. No change) | 0.52 (0.07-3.67) | 0.34 (0.05-2.44) | * | * |
|  | Good change (vs. No change) | 0.68 (0.38-1.20) | 1.06 (0.56-2.01) | 0.27 (0.09-0.83)* | 0.57 (0.17-1.93) |
| Drinking frequency before cure | Frequent drinker (vs. Non drinker) | 1.26 (0.88-1.83) | 1.25 (0.84-1.87) | 1.42 (0.92-2.18) | 1.19 (0.74-1.92) |
|  | Intermediate drinker (vs. Non drinker) | 0.86 (0.60-1.24) | 0.83 (0.55-1.23) | 0.77 (0.48-1.24) | 0.85 (0.51-1.42) |
|  | Rare drinker (vs. Non drinker) | 1.00 (0.77-1.31) | 0.91 (0.68-1.22) | 0.82 (0.58-1.16) | 0.93 (0.64-1.36) |
| Drinking frequency change after cure | Bad change (vs. No change) | 1.48 (0.61-3.59) | 2.03 (0.81-5.05) | 0.45 (0.06-3.24) | 1.40 (0.18-10.66) |
|  | Good change (vs. No change) | 0.46 (0.23-0.93) | 0.50 (0.23-1.07) | 0.28 (0.09-0.86)* | 0.66 (0.19-2.27) |
| Physical activity before cure | Yes (vs. No) | 0.92 (0.74-1.14) | 0.87 (0.69-1.10) | 0.66 (0.50-0.88)* | 0.77 (0.57-1.03) |
| Physical activity change after cure | Bad change (vs. No change) | 0.68 (0.38-1.21) | 0.86 (0.47-1.58) | 0.64 (0.30-1.35) | 2.14 (0.91-5.04) |
|  | Good change (vs. No change) | 0.39 (0.18-0.82)* | 0.47 (0.21-1.02) | 0.45 (0.19-1.10) | 1.10 (0.42-2.88) |
| Family history of gastric cancer | Yes (vs. No) | 0.62 (0.49-0.79)* | 0.69 (0.54-0.89)* | 0.34 (0.24-0.48)* | 0.43 (0.30-0.63)* |

*p value < 0.05

†Age was treated as a categorical variable in mortality analysis

‡BMI change was treated as a categorical variable in mortality analysis

**Supplementary Table 3. Hazard ratio of *H. pylori* eradication for gastric cancer recurrence and mortality stratified by treatment method**

|  | **Recurrence** | **Mortality** |
| --- | --- | --- |
| **Treatment method** | **HR (95% CI)** | **HR (95% CI)** |
| **ESD** | 0.61 (0.44-0.86) | 0.08 (0.01-0.63) |
| **Gastrectomy** | 1.34 (0.73-2.44) | 0.50 (0.20-1.27) |
| **Adjuvant chemotherapy** | 0.95 (0.52-1.73) | 0.68 (0.34-1.34) |

*Adjusted for age, sex, T stage, N stage, and CEA level
